# Supplementary material
Source: HighWire-hosted journal article supplement (https://www.cmaj.ca/content/suppl/2020/07/21/192.30.E851)
Supplement: 200089-res-4-at.pdf [file 200089-res-4-at.pdf]

**Appendix 4 (as supplied by the authors):** Crude (blue circles) and adjusted (red circles) relative risk for the primary and secondary outcomes among those with a pre-pregnancy serum creatinine (SCr), 1:1 matched by year to a group of women without a pre-pregnancy SCr (black dots)<sup>a,b</sup>

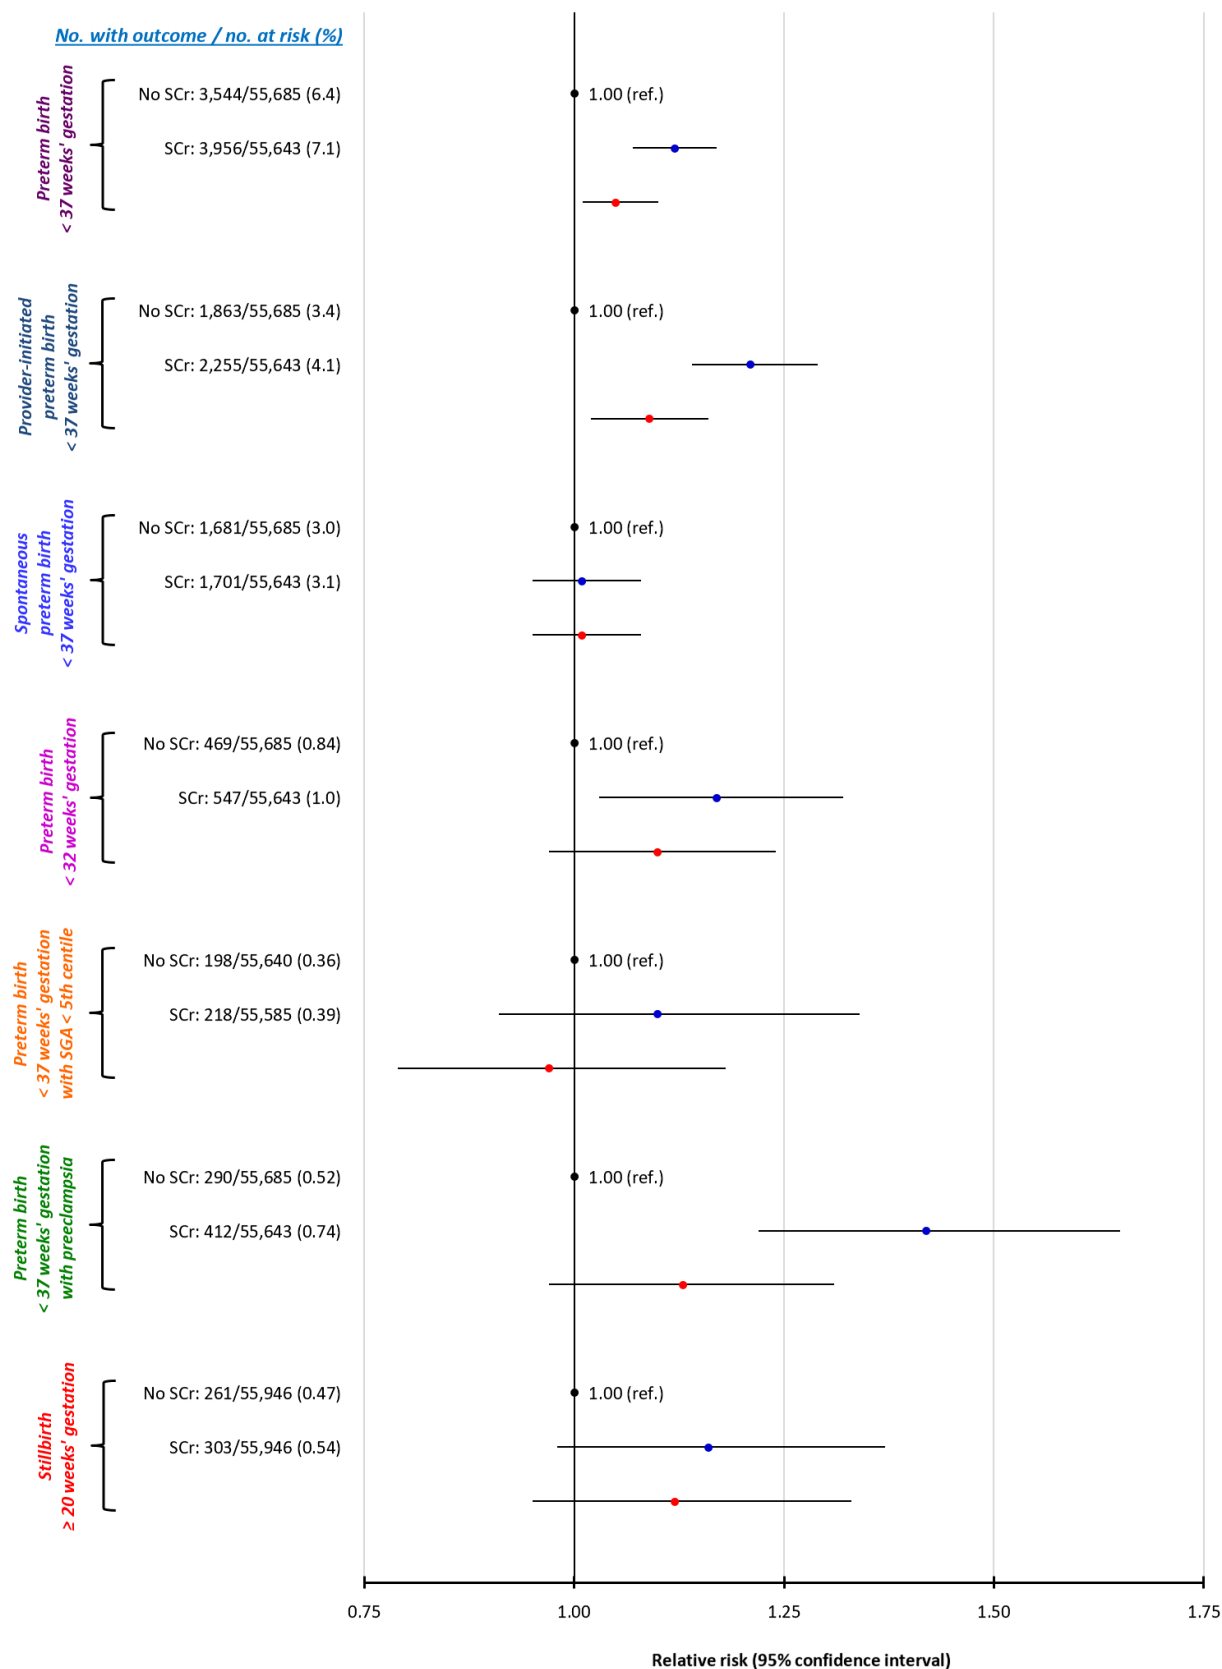

Appendix to: Harel Z, Park AL, McArthur E, et al. Prepregnancy renal function and risk of preterm birth and related outcomes.

CMAJ 2020. DOI:10.1503/cmaj.200089

Copyright © 2020 The Author(s) or their employer(s).

To receive this resource in an accessible format, please contact us at [cmajgroup@cmaj.ca](mailto:cmajgroup@cmaj.ca).

<sup>a</sup>For all outcomes, except stillbirth, the denominator is a live birth. For stillbirth, the denominator is a livebirth or stillbirth.

<sup>b</sup>All models were adjusted for maternal age, rural or urban residence, residential income quintile (Q1/missing, Q2, Q3, Q4, Q5), World Region of Origin (Asia, Caribbean/Africa, Hispanic America, Other) -- each at the time of the index conception -- as well as diabetes mellitus, chronic hypertension and illicit drug or tobacco use within 4 years before the index conception date.
